# Supplementary material for: On the Effectiveness of Sexual Offender Treatment in Prisons: A Comparison of Two Different Evaluation Designs in Routine Practice
Source: PubMed Central journal article supplement — Sex Abuse. 2019 Aug 27;32(4):452–75. doi: 10.1177/1079063219871576 (PMC7218343; doi:10.1177/1079063219871576), 2019-08-27
Supplement: supplement_material.pdf [file supplement_material.pdf]

## Appendix

Table A1

*Baseline characteristics of treated and untreated subjects in the original and the propensity score weighted sample*

| Variable                                                               | Sample   | Treatment Group | Comparison Group | (Absolute) Standardized Difference |
|------------------------------------------------------------------------|----------|-----------------|------------------|------------------------------------|
| Age at release                                                         | Original | 42.91 ± 11.57   | 43.86 ± 12.42    | 7.92                               |
|                                                                        | Weighted | 43.39 ± 11.72   | 43.62 ± 12.31    | 1.92                               |
| Never been married or lived with a partner for at least two years      | Original | 29.8%           | 25.3%            | 9.96                               |
|                                                                        | Weighted | 26.0%           | 23.6%            | 5.35                               |
| Broken home: some problems                                             | Original | 39.3%           | 33.9%            | 11.05                              |
|                                                                        | Weighted | 36.3%           | 37.2%            | 1.95                               |
| Broken home: significant problems                                      | Original | 16.7%           | 12.2%            | 12.81                              |
|                                                                        | Weighted | 14.3%           | 16.2%            | 5.49                               |
| Third-party care during childhood: up to two years                     | Original | 8.4%            | 7.2%             | 4.43                               |
|                                                                        | Weighted | 7.9%            | 9.4%             | 5.33                               |
| Third-party care during childhood: long term                           | Original | 5.0%            | 4.1%             | 4.40                               |
|                                                                        | Weighted | 3.9%            | 4.7%             | 3.93                               |
| Third-party care during childhood: grew up in a foster/adoptive family | Original | 4.7%            | 2.1%             | 14.90                              |
|                                                                        | Weighted | 3.3%            | 4.9%             | 8.49                               |
| Third-party care during childhood: multiple changes                    | Original | 5.3%            | 7.5%             | 9.09                               |
|                                                                        | Weighted | 5.4%            | 6.5%             | 4.46                               |
| Never completed vocational training                                    | Original | 28.6%           | 43.1%            | 30.60                              |
|                                                                        | Weighted | 35.4%           | 35.3%            | 0.08                               |
| Working life: some problems                                            | Original | 33.4%           | 37.6%            | 8.69                               |
|                                                                        | Weighted | 36.3%           | 36.1%            | 0.43                               |
| Working life: significant problems                                     | Original | 20.5%           | 33.4%            | 29.46                              |
|                                                                        | Weighted | 24.2%           | 26.1%            | 4.40                               |
| Romantic relationships: some problems                                  | Original | 56.7%           | 51.9%            | 9.80                               |
|                                                                        | Weighted | 57.5%           | 57.4%            | 0.34                               |
| Romantic relationships: significant problems                           | Original | 37.9%           | 32.5%            | 11.28                              |
|                                                                        | Weighted | 34.6%           | 34.4%            | 0.51                               |
| Social integration: some problems                                      | Original | 41.7%           | 48.1%            | 12.89                              |
|                                                                        | Weighted | 44.7%           | 44.0%            | 1.33                               |
| Social integration: significant problems                               | Original | 11.7%           | 18.1%            | 18.06                              |
|                                                                        | Weighted | 13.9%           | 13.8%            | 0.24                               |
| Migration background: grew                                             | Original | 4.1%            | 4.4%             | 1.33                               |

|                                                                             |          |             |             |       |
|-----------------------------------------------------------------------------|----------|-------------|-------------|-------|
| up in Germany with at least one parent being a migrant                      | Weighted | 3.6%        | 3.6%        | 0.20  |
| Migration background: first generation migrant                              | Original | 9.3%        | 27.6%       | 48.38 |
|                                                                             | Weighted | 16.3%       | 15.4%       | 2.33  |
| More than three previous convictions                                        | Original | 23.3%       | 42.8%       | 42.23 |
|                                                                             | Weighted | 29.9%       | 31.1%       | 2.79  |
| Juvenile offending: minor penalties                                         | Original | 11.0%       | 9.0%        | 7.00  |
|                                                                             | Weighted | 10.1%       | 10.9%       | 2.43  |
| Juvenile offending: suspended sentence                                      | Original | 8.0%        | 5.2%        | 11.13 |
|                                                                             | Weighted | 7.1%        | 7.6%        | 1.99  |
| Juvenile offending: non-suspended sentence                                  | Original | 6.4%        | 11.7%       | 18.83 |
|                                                                             | Weighted | 8.9%        | 9.4%        | 1.63  |
| Number of revoked probations                                                | Original | 0.37 ± 0.80 | 0.69 ± 1.27 | 30.24 |
|                                                                             | Weighted | 0.49 ± 0.95 | 0.52 ± 1.35 | 1.98  |
| Index non-sexual violence: any convictions                                  | Original | 23.4%       | 35.5%       | 26.84 |
|                                                                             | Weighted | 28.9%       | 28.5%       | 0.80  |
| Prior non-sexual violence: any convictions                                  | Original | 16.3%       | 34.7%       | 43.24 |
|                                                                             | Weighted | 22.9%       | 21.8%       | 2.52  |
| Prior arrest                                                                | Original | 19.2%       | 34.3%       | 34.66 |
|                                                                             | Weighted | 23.9%       | 24.3%       | 0.82  |
| Years spent in prison                                                       | Original | 4.54 ± 4.27 | 4.56 ± 4.05 | 0.32  |
|                                                                             | Weighted | 4.53 ± 3.89 | 4.96 ± 5.80 | 8.64  |
| Prior placement under shelter due to mental disorders                       | Original | 3.3%        | 6.7%        | 15.85 |
|                                                                             | Weighted | 4.3%        | 4.5%        | 0.95  |
| Current placement under shelter due to mental disorders                     | Original | 0.8%        | 3.7%        | 19.34 |
|                                                                             | Weighted | 1.5%        | 1.4%        | 0.86  |
| Diminished responsibility                                                   | Original | 10.4%       | 17.2%       | 19.86 |
|                                                                             | Weighted | 12.1%       | 11.1%       | 2.93  |
| Alcohol abuse: minor                                                        | Original | 20.7%       | 23.5%       | 6.87  |
|                                                                             | Weighted | 22.3%       | 22.2%       | 0.12  |
| Alcohol abuse: severe                                                       | Original | 26.7%       | 39.4%       | 27.21 |
|                                                                             | Weighted | 30.6%       | 30.5%       | 0.21  |
| Drug abuse: minor                                                           | Original | 10.6%       | 10.8%       | 0.48  |
|                                                                             | Weighted | 9.5%        | 9.4%        | 0.24  |
| Drug abuse: severe                                                          | Original | 7.0%        | 9.7%        | 9.91  |
|                                                                             | Weighted | 9.0%        | 10.4%       | 4.51  |
| Type of sex offenses: only child abuse                                      | Original | 58.4%       | 40.4%       | 36.58 |
|                                                                             | Weighted | 50.9%       | 49.3%       | 3.10  |
| Type of sex offenses: only rape or sexual assault of adolescents and adults | Original | 31.5%       | 47.4%       | 32.96 |
|                                                                             | Weighted | 37.6%       | 38.9%       | 2.63  |
| Type of sex offenses: child                                                 | Original | 7.9%        | 7.6%        | 1.12  |

|                                                                         |          |               |               |       |
|-------------------------------------------------------------------------|----------|---------------|---------------|-------|
| abuse and rape                                                          | Weighted | 8.9%          | 8.9%          | 0.03  |
| Number of prior sex offenses: 0-2                                       | Original | 14.8%         | 14.2%         | 1.94  |
|                                                                         | Weighted | 12.4%         | 11.2%         | 3.85  |
| Number of prior sex offenses: 3-5                                       | Original | 3.6%          | 2.5%          | 6.49  |
|                                                                         | Weighted | 3.4%          | 2.6%          | 4.58  |
| Number of prior sex offenses: 6 or more                                 | Original | 2.7%          | 2.8%          | 0.13  |
|                                                                         | Weighted | 3.2%          | 3.5%          | 1.64  |
| Number of victims from sex offenses                                     | Original | 2.13 ± 2.17   | 1.63 ± 1.97   | 24.54 |
|                                                                         | Weighted | 1.88 ± 1.66   | 1.99 ± 3.14   | 4.17  |
| Non-contact sex offenses: any convictions                               | Original | 11.5%         | 10.1%         | 4.66  |
|                                                                         | Weighted | 10.6%         | 11.3%         | 2.49  |
| Any unrelated victims                                                   | Original | 62.7%         | 66.3%         | 7.36  |
|                                                                         | Weighted | 62.0%         | 62.5%         | 1.00  |
| Any stranger victims                                                    | Original | 20.1%         | 21.8%         | 4.40  |
|                                                                         | Weighted | 20.2%         | 23.1%         | 7.05  |
| Any male victims                                                        | Original | 21.6%         | 9.2%          | 34.87 |
|                                                                         | Weighted | 15.2%         | 16.0%         | 2.17  |
| High density of offenses                                                | Original | 27.4%         | 22.6%         | 11.02 |
|                                                                         | Weighted | 25.2%         | 25.8%         | 1.42  |
| Different types of sex offenses                                         | Original | 21.4%         | 17.2%         | 10.64 |
|                                                                         | Weighted | 20.1%         | 20.0%         | 0.34  |
| Physically injured victims                                              | Original | 18.6%         | 24.0%         | 13.14 |
|                                                                         | Weighted | 19.2%         | 23.0%         | 9.46  |
| Use of weapons or death threat                                          | Original | 25.5%         | 26.5%         | 2.26  |
|                                                                         | Weighted | 25.2%         | 24.4%         | 1.81  |
| Increasing frequency or severity of offenses                            | Original | 23.5%         | 17.1%         | 15.83 |
|                                                                         | Weighted | 20.0%         | 24.3%         | 10.22 |
| Minimisation of the index offense                                       | Original | 65.5%         | 61.4%         | 8.41  |
|                                                                         | Weighted | 63.6%         | 60.5%         | 6.36  |
| Age at first sex offense                                                | Original | 34.12 ± 10.63 | 35.31 ± 11.93 | 10.52 |
|                                                                         | Weighted | 34.16 ± 11.42 | 34.55 ± 10.75 | 3.56  |
| Planning of offense(s): can be assumed without proof                    | Original | 22.7%         | 23.5%         | 1.99  |
|                                                                         | Weighted | 21.9%         | 21.0%         | 2.10  |
| Planning of offense(s): discernible indications                         | Original | 34.3%         | 29.2%         | 10.86 |
|                                                                         | Weighted | 33.2%         | 32.5%         | 1.47  |
| Planning of offense(s): at least one offense has been carefully planned | Original | 18.8%         | 12.4%         | 17.72 |
|                                                                         | Weighted | 16.0%         | 19.3%         | 8.88  |
| Offense under the influence of alcohol: yes but did not trigger offense | Original | 16.3%         | 16.5%         | 0.55  |
|                                                                         | Weighted | 17.0%         | 22.6%         | 14.12 |
| Offense under the influence of alcohol: yes, did trigger                | Original | 14.3%         | 20.3%         | 15.72 |
|                                                                         | Weighted | 17.0%         | 14.9%         | 5.86  |

|                             |          |                |                |       |
|-----------------------------|----------|----------------|----------------|-------|
| offense                     |          |                |                |       |
| Offense under the influence | Original | 5.0%           | 9.8%           | 18.63 |
| of alcohol: diminished      | Weighted | 5.9%           | 5.3%           | 2.82  |
| responsibility              |          |                |                |       |
| Year of release             | Original | 2005.91 ± 1.44 | 2006.00 ± 1.41 | 6.74  |
|                             | Weighted | 2005.97 ± 1.48 | 2005.95 ± 1.36 | 1.32  |

Note: For continuous variables means and ( $\pm$ ) standard deviations are reported, while

categorical variables are represented as %. Reference categories are excluded from the table.
